# Supplementary material for: Stability of Pt near surface alloys under electrochemical conditions: a model study
Source: Royal Society of Chemistry journal article supplement (doi:10.1039/c4cp01942c), 2014-01-01
Supplement: c4cp01942c1.pdf [file c4cp01942c1.pdf]

### Supporting information

#### Stability of Pt near surface alloys under electrochemical conditions: a model study

Xiaoming Zhang,<sup>1</sup> Shansheng Yu<sup>1</sup>, Weitao Zheng<sup>1\*</sup> and Ping Liu<sup>2\*</sup>

<sup>1</sup>Department of Materials Science, Key Laboratory of Mobile Materials, MOE, and State Key Laboratory of Superhard Materials, Jilin University, Changchun 130012, PR China.

<sup>2</sup>Center for Functional Nanomaterials, Brookhaven National Laboratory, NY 11973, USA

#### Results

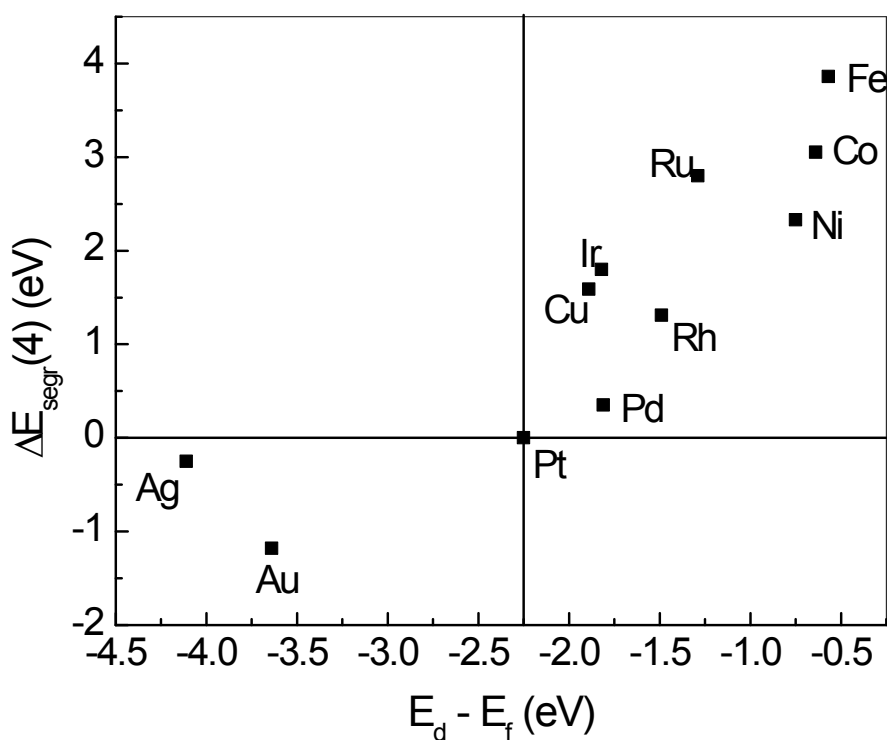

Figure S1 Correlation between the calculated  $\Delta E_{segr}(4)$  for  $Pt_{ML}/M_{ML}/Pt(111)$  NSAs under vacuum conditions and the d-band center of M on the surface of  $M_{ML}/Pt(111)$ . The d-band center was cited from Ref (40).

Table S1 Segregation energies (eV) for various NSAs under vacuum conditions

| M  | $\Delta E_{\text{segr}} (1)$ | $\Delta E_{\text{segr}} (2)$ | $\Delta E_{\text{segr}} (3)$ | $\Delta E_{\text{segr}} (4)$ |
|----|------------------------------|------------------------------|------------------------------|------------------------------|
| Fe | 0.65                         | 1.68                         | 2.21                         | 3.86                         |
| Co | 0.69                         | 1.48                         | 1.97                         | 3.05                         |
| Ni | 0.63                         | 1.32                         | 1.69                         | 2.33                         |
| Cu | 0.5                          | 0.93                         | 1.26                         | 1.59                         |
| Ru | 0.51                         | 1.06                         | 1.83                         | 2.8                          |
| Rh | 0.23                         | 0.58                         | 0.95                         | 1.31                         |
| Pd | 0.07                         | 0.17                         | 0.26                         | 0.35                         |
| Ag | 0.24                         | -0.01                        | 0.09                         | -0.25                        |
| Os | 0.74                         | 1.19                         | 2.05                         | 2.89                         |
| Ir | 0.54                         | 0.82                         | 1.39                         | 1.80                         |
| Pt | 0                            | 0                            | 0                            | 0                            |
| Au | -0.09                        | -0.46                        | -0.68                        | -1.18                        |

Table S2 Segregation energies (eV) for various NSAs in  $HClO_4$  solution

| M  | $\Delta E_{\text{segr}} (1)$ | $\Delta E_{\text{segr}} (2)$ | $\Delta E_{\text{segr}} (3)$ |
|----|------------------------------|------------------------------|------------------------------|
| Fe | 0.38                         | 0.64                         | -0-0                         |
| Co | 0.28                         | 0.32                         | 0.67                         |
| Ni | 0.16                         | 0.20                         | 0.45                         |
| Cu | -0.01                        | -0.08                        | 0.02                         |
| Ru | 0.33                         | 0.57                         | 0.89                         |
| Rh | -0.03                        | -0.07                        | -0.06                        |
| Pd | -0.08                        | -0.18                        | -0.20                        |
| Os | 0.55                         | 0.77                         | 1.48                         |
| Ir | 0.26                         | 0.31                         | 0.78                         |
| Pt | 0                            | 0                            | 0                            |

Table S3 Segregation energies (eV) for various NSAs in  $H_2SO_4$  solution

| M  | $\Delta E_{\text{segr}} (1)$ | $\Delta E_{\text{segr}} (2)$ | $\Delta E_{\text{segr}} (3)$ |
|----|------------------------------|------------------------------|------------------------------|
| Fe | -0.04                        | 0.04                         | 0.05                         |
| Co | -0.04                        | -0.18                        | -0.06                        |
| Ni | -0.01                        | -0.10                        | 0.01                         |
| Cu | -0.28                        | -0.29                        | -0.31                        |
| Ru | 0.08                         | 0.05                         | 0.09                         |
| Rh | -0.13                        | -0.19                        | -0.18                        |
| Pd | -0.04                        | -0.03                        | -0.02                        |
| Os | 0.32                         | 0.50                         | 0.42                         |
| Ir | 0.21                         | 0.32                         | 0.29                         |
| Pt | 0                            | 0                            | 0                            |

Table S4 Segregation energies (eV) for various NSAs in  $H_3PO_4$  solution

| M  | $\Delta E_{\text{segr}} (1)$ | $\Delta E_{\text{segr}} (2)$ | $\Delta E_{\text{segr}} (3)$ |
|----|------------------------------|------------------------------|------------------------------|
| Fe | -0.36                        | -0.52                        | -0.76                        |
| Co | -0.23                        | -0.52                        | -0.57                        |
| Ni | -0.08                        | -0.23                        | -0.20                        |
| Cu | -0.09                        | -0.09                        | -0.45                        |
| Ru | -0.26                        | -0.48                        | -0.59                        |
| Rh | -0.13                        | -0.17                        | -0.16                        |
| Pd | 0.03                         | 0.04                         | 0.13                         |
| Os | -0.06                        | -0.37                        | -0.53                        |
| Ir | 0.11                         | 0                            | -0.01                        |
| Pt | 0                            | 0                            | 0                            |

Table S5 Segregation energies (eV) for various NSAs in alkaline solution

| M  | $\Delta E_{\text{segr}} (1)$ | $\Delta E_{\text{segr}} (2)$ | $\Delta E_{\text{segr}} (3)$ |
|----|------------------------------|------------------------------|------------------------------|
| Fe | 0.15                         | 0.80                         | 0.81                         |
| Co | 0.08                         | 0.44                         | 0.32                         |
| Ni | 0.16                         | 0.49                         | 0.04                         |
| Cu | -0.10                        | 0.21                         | -0.11                        |
| Ru | -0.05                        | 0.33                         | 0.70                         |
| Rh | 0.04                         | 0.02                         | 0                            |
| Pd | 0.20                         | 0.08                         | -0.15                        |
| Os | -0.04                        | 0.53                         | 1.27                         |
| Ir | 0.08                         | 0.30                         | 1.03                         |
| Pt | 0                            | 0                            | 0                            |

Table S6 Segregation energies (eV) for various NSAs in interaction with \*O

| M  | $\Delta E_{\text{segr}} (1)$ | $\Delta E_{\text{segr}} (2)$ | $\Delta E_{\text{segr}} (3)$ |
|----|------------------------------|------------------------------|------------------------------|
| Fe | -0.30                        | -0.52                        | -0.60                        |
| Co | -0.28                        | -0.68                        | -0.59                        |
| Ni | -0.09                        | -0.45                        | -0.43                        |
| Cu | 0.10                         | 0.048                        | 0.18                         |
| Ru | -0.26                        | -0.40                        | -0.48                        |
| Rh | -0.06                        | -0.26                        | -0.22                        |
| Pd | -0.01                        | -0.11                        | -0.06                        |
| Os | -0.62                        | -0.25                        | -0.34                        |
| Ir | 0.20                         | 0.29                         | 0.29                         |
| Pt | 0                            | 0                            | 0                            |

Table S7 Segregation energies (eV) for various NSAs in interaction with \*OOH

| M  | $\Delta E_{\text{segr}} (1)$ | $\Delta E_{\text{segr}} (2)$ |
|----|------------------------------|------------------------------|
| Fe | 0.20                         | -1.32                        |
| Co | 0.10                         | -1.14                        |
| Ni | 0.27                         | 0.64                         |
| Cu | 0.22                         | 0.86                         |
| Ru | -0.02                        | -1.58                        |
| Rh | -0.02                        | 0                            |
| Pd | 0.14                         | 0.17                         |
| Os | -1.70                        | -2.05                        |
| Ir | 0.08                         | -0.87                        |
| Pt | 0                            | 0                            |
